# Supplementary material
Source: PubMed Central journal article supplement (PMC3457545)
Supplement: MCB.00723-12_zmb999109680so1.pdf [file MCB.00723-12_zmb999109680so1.pdf]

# Supplemental Figure 1

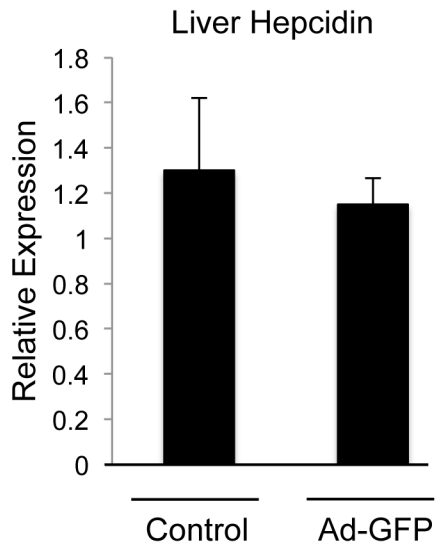

**Supplemental Figure 1. Adenoviral infection does not induce hepcidin expression.** Mice were infected with GFP-expressing adenovirus and analyzed 3 days after infection. Gene expression was examined by qPCR for hepcidin and normalized to  $\beta$ -actin. n = 3 animals per group.

## Supplemental Table 1

### Primers for qPCR and cloning

| qPCR Primers               | Sequence (5' to 3')     |
|----------------------------|-------------------------|
| Human $\beta$ -actin F     | GTTGTCGACGACGAGCG       |
| Human $\beta$ -actin R     | GCACAGAGCCTCGCCTT       |
| Mouse $\beta$ -actin F     | TATTGGCAACGAGCGGTTCC    |
| Mouse $\beta$ -actin R     | GGCATAGAGGTCTTTACGGATGT |
| Human hepc F               | CTCCTTCGCCTCTGGAACAT    |
| Human hepc R               | AGTGGCTCTGTTTTCCACA     |
| Mouse EPO F                | CATCTGCGACAGTCGAGTTCTG  |
| Mouse EPO R                | CACAACCCATCGTGACATTTTC  |
| Mouse C/EBP $\alpha$ F     | GAACAGCAACGAGTACCGGGT   |
| Mouse C/EBP $\alpha$ R     | GCCATGGCCTTGACCAAGGAG   |
| Mouse Arnt F               | CAAGCCATCTTTCCTCACTGATC |
| Mouse Arnt R               | ACACCACCCGTCCAGTCTCA    |
| <b>Mutagenesis Primers</b> |                         |
| C/EBP $\alpha$ S193A TOP   | ACCCGCACGCGGCTCCCGCGCAC |
| C/EBP $\alpha$ S193A BOT   | GTGCGCGGGAGCCGCGTGCGGGT |
